# Supplementary material for: A nitrogen-doped nanotube molecule with atom vacancy defects
Source: PubMed Central journal article supplement (PMC7156684; doi:10.1038/s41467-020-15662-6), 2020-04-14
Supplement: 41467_2020_15662_MOESM3_ESM.pdf [file 41467_2020_15662_MOESM3_ESM.pdf]

## **Description of Additional Supplementary Files**

File Name: Supplementary Data 1

Description: Cartesian coordinates of (12,12)-NpNT

File Name: Supplementary Data 2

Description: Cartesian coordinates of 4,4'-bipyridine
